# Supplementary material
Source: HighWire-hosted journal article supplement (https://openres.ersjournals.com/content/8/4/00205-2022)
Supplement: inline-supplementary-material-1 [file inline-supplementary-material-1.pdf]

**Supplement 1. Deletions during development of the final questionnaire.**

| <b>Focus Group Discussion</b>       |            |                           |
|-------------------------------------|------------|---------------------------|
| Deletion #                          | Category   | Deleted Item              |
| 1.                                  | Exposure   | Swamp Cooler              |
| 2.                                  | Exposure   | Humidifier                |
| 3.                                  | Exposure   | Beryllium                 |
| 4.                                  | Exposure   | Talc                      |
| 5.                                  | Exposure   | Mica                      |
| 6.                                  | Medication | Gold Salts                |
| 7.                                  | Medication | NAC                       |
| 8.                                  | Medication | Prednisone                |
| 9.                                  | Medication | IFN-gamma                 |
| 10.                                 | Medication | Colchicine                |
| <b>Pan-African Thoracic Society</b> |            |                           |
| 1.                                  | Exposure   | Air Cleaner / Purifier    |
| 2.                                  | Exposure   | Steam Sauna/ Steam Shower |
| 3.                                  | Exposure   | Jacuzzi or Hot-Tub        |
| 4.                                  | Exposure   | Aquariums or Fish Tanks   |
| 5.                                  | Exposure   | Leaking Appliances /Sinks |
| 6.                                  | Occupation | Aviation Worker*          |
| 7.                                  | Occupation | Soldier*                  |
| 8.                                  | Medication | Bosentan                  |

\*Added during focus group discussion but subsequently deleted during PATS ranking
